# Supplementary material for: Investigating the Effect of Fuel Moisture and Atmospheric Instability on PyroCb Occurrence over Southeast Australia
Source: MDPI journal article supplement (doi:10.3390/atmos14071087), 2023-06-28
Supplement: s1 [file s1]

**Supplementary Materials:**
**Table S1 Australian PyroCb Register**

| <b>Id</b> | <b>Event</b>                             | <b>Year</b> | <b>Date</b> | <b>State</b> | <b>Location</b>       | <b>Longi-<br/>tude</b> | <b>Lati-<br/>tude</b> | <b>Level of<br/>confidence</b> |
|-----------|------------------------------------------|-------------|-------------|--------------|-----------------------|------------------------|-----------------------|--------------------------------|
| 1983a     | 1983 (16 Feb) SA: Ade-<br>laide Hills    | 1983        | 16/02/1983  | SA           | Adelaide<br>Hills     | 137.5                  | -35                   | High                           |
| 1983b     | 1983 (16 Feb) Vic:<br>Lorne              | 1983        | 16/02/1983  | Vic          | Lorne                 | 144                    | -38                   | High                           |
| 1994a     | 1994 (23 Jan) WA:<br>WSW Kalgoorlie      | 1994        | 23/01/1994  | WA           | WSW Kal-<br>goorlie   | 120                    | -32                   | Moderate                       |
| 1995a     | 1995 (25 Feb) Vic: Ber-<br>ringa         | 1995        | 25/02/1995  | Vic          | Berrington            | 143.7                  | -37.8                 | Very high                      |
| 1998a     | 1998 (02 Feb) Vic: Cal-<br>edonia River  | 1998        | 02/02/1998  | Vic          | Caledonia<br>River    | 146.8                  | -37.5                 | Very high                      |
| 2001a     | 2001 (18 Jan) WA:<br>Splinter Rock       | 2001        | 18/01/2001  | WA           | Splinter<br>Rock      | 122.9                  | -33.1                 | Very high                      |
| 2002a     | 2002 (17 Dec) Vic: Big<br>Desert         | 2002        | 17/12/2002  | Vic          | Big Desert            | 141                    | -35.7                 | Very high                      |
| 2003a     | 2003 (10 Jan) WA:<br>Mount Cooke         | 2003        | 10/01/2003  | WA           | Mount<br>Cooke        | 116.3                  | -32.4                 | Very high                      |
| 2003b     | 2003 (17 Jan) ACT:<br>Stockyard Spur     | 2003        | 17/01/2003  | ACT          | Stockyard<br>Spur     | 148.9                  | -35.5                 | Very high                      |
| 2003c     | 2003 (17 Jan) NSW:<br>Cabramurra         | 2003        | 17/01/2003  | NSW          | Cabramurra            | 148.5                  | -36                   | Very high                      |
| 2003d     | 2003 (17 Jan) NSW:<br>Thredbo            | 2003        | 17/01/2003  | NSW          | Thredbo               | 148.3                  | -36.5                 | Very high                      |
| 2003e     | 2003 (18 Jan) NSW:<br>Broken Cart Fire   | 2003        | 18/01/2003  | NSW          | Broken Cart<br>Fire   | 148.6                  | -35.5                 | Very high                      |
| 2003f     | 2003 (18 Jan) ACT:<br>Stockyard Complex  | 2003        | 18/01/2003  | ACT          | Stockyard<br>Complex  | 148.9                  | -35.6                 | Very high                      |
| 2003g     | 2003 (18 Jan) ACT:<br>Stockyard Complex  | 2003        | 18/01/2003  | ACT          | Stockyard<br>Complex  | 148.8                  | -35.5                 | Very high                      |
| 2003h     | 2003 (18 Jan) NSW:<br>McIntyres Hut Fire | 2003        | 18/01/2003  | NSW          | McIntyres<br>Hut Fire | 148.8                  | -35.3                 | Very high                      |
| 2003i     | 2003 (18 Jan) NSW:<br>Tumut River        | 2003        | 18/01/2003  | NSW          | Tumut<br>River        | 148.4                  | -36                   | Very high                      |
| 2003j     | 2003 (26 Jan) NSW: Al-<br>pine Complex   | 2003        | 26/01/2003  | NSW          | Alpine<br>Complex     | 147                    | -37                   | Very high                      |
| 2003k     | 2003 (30 Jan) NSW: Al-<br>pine Complex   | 2003        | 30/01/2003  | NSW          | Alpine<br>Complex     | 148                    | -37                   | Very high                      |
| 2006a     | 2006 (19 Jan) Vic:<br>Grampians          | 2006        | 19/01/2006  | Vic          | Grampians             | 142.4                  | -37.3                 | Very high                      |
| 2006b     | 2006 (22 Nov) NSW:<br>Wollemi            | 2006        | 22/11/2006  | NSW          | Wollemi               | 150.3                  | -32.8                 | Very high                      |
| 2006c     | 2006 (22 Nov) NSW:<br>Grose Valley       | 2006        | 22/11/2006  | NSW          | Grose Val-<br>ley     | 150.3                  | -33.6                 | Very high                      |
| 2006d     | 2006 (29 Nov) NSW:<br>Pilliga            | 2006        | 29/11/2006  | NSW          | Pilliga               | 149.2                  | -31                   | Very high                      |

|       |                                   |      |            |     |                |        |        |           |
|-------|-----------------------------------|------|------------|-----|----------------|--------|--------|-----------|
| 2006e | 2006 (06 Dec) Vic: Dandongadale   | 2006 | 06/12/2006 | Vic | Dandongadale   | 146.6  | -36.8  | Moderate  |
| 2006f | 2006 (06 Dec) Vic: Basalt Knob #1 | 2006 | 06/12/2006 | Vic | Basalt Knob #1 | 146.5  | -37.4  | Moderate  |
| 2006g | 2006 (06 Dec) Vic: Licola         | 2006 | 06/12/2006 | Vic | Licola         | 146.8  | -37.6  | Moderate  |
| 2006h | 2006 (10 Dec) Vic: Black Range    | 2006 | 10/12/2006 | Vic | Black Range    | 146.6  | -37.8  | Moderate  |
| 2006i | 2006 (10 Dec) Vic: Basalt Knob #2 | 2006 | 10/12/2006 | Vic | Basalt Knob #2 | 146.5  | -37.4  | Moderate  |
| 2006j | 2006 (10 Dec) Vic: Turton river   | 2006 | 10/12/2006 | Vic | Turton river   | 147    | -37.7  | Moderate  |
| 2006k | 2006 (14 Dec) Vic: East Licola    | 2006 | 14/12/2006 | Vic | East Licola    | 146.8  | -37.6  | Moderate  |
| 2006l | 2006 (14 Dec) Vic: Thomson River  | 2006 | 14/12/2006 | Vic | Thomson River  | 146.6  | -38    | Moderate  |
| 2006m | 2006 (14 Dec) Vic: Gaffneys Creek | 2006 | 14/12/2006 | Vic | Gaffneys Creek | 146.2  | -37.5  | Moderate  |
| 2007a | 2007 (16 Jan) Vic: Mount Buller   | 2007 | 16/01/2007 | Vic | Mount Buller   | 146.4  | -37.1  | Very high |
| 2009a | 2009 (07 Feb) Vic: Kilmore Gap    | 2009 | 07/02/2009 | Vic | Kilmore Gap    | 145.1  | -37.2  | Very high |
| 2009b | 2009 (07 Feb) Vic: Murrundindi    | 2009 | 07/02/2009 | Vic | Murrundindi    | 145.5  | -37.4  | Very high |
| 2009c | 2009 (07 Feb) Vic: Bunyip         | 2009 | 07/02/2009 | Vic | Bunyip         | 145.7  | -37.9  | Very high |
| 2009d | 2009 (07 Feb) Vic: Dargo          | 2009 | 07/02/2009 | Vic | Dargo          | 147.16 | -37.24 | Very high |
| 2009e | 2009 (07 Feb) Vic: Beechworth     | 2009 | 07/02/2009 | Vic | Beechworth     | 146.7  | -36.4  | Very high |
| 2010a | 2010 (18 Feb) WA: Esperance       | 2010 | 18/02/2010 | WA  | Esperance      | 122.2  | -33.1  | Very high |
| 2012a | 2012 (18 Oct) WA: Deserts         | 2012 | 18/10/2012 | WA  | Deserts        | 125.1  | -27.3  | Very high |
| 2012b | 2012 (18 Oct) WA: Deserts         | 2012 | 18/10/2012 | WA  | Deserts        | 124.8  | -26.5  | Very high |
| 2012c | 2012 (18 Oct) WA: Deserts         | 2012 | 18/10/2012 | WA  | Deserts        | 126.7  | -27.4  | Very high |
| 2012d | 2012 (18 Oct) WA: Deserts         | 2012 | 18/10/2012 | WA  | Deserts        | 126    | -27.6  | Very high |
| 2012e | 2012 (18 Oct) WA: Deserts         | 2012 | 18/10/2012 | WA  | Deserts        | 126.7  | -28.3  | Very high |
| 2012f | 2012 (29 Oct) WA: Deserts         | 2012 | 29/10/2012 | WA  | Deserts        | 122.8  | -28.5  | Very high |
| 2013a | 2013 (04 Jan) Tas: Dunalley       | 2013 | 04/01/2013 | Tas | Dunalley       | 147.7  | -42.9  | Very high |
| 2013b | 2013 (13 Jan) NSW: Wambelong      | 2013 | 13/01/2013 | NSW | Wambelong      | 149    | -31.3  | Very high |
| 2013c | 2013 (21 Feb) Vic: Grampians      | 2013 | 21/02/2013 | Vic | Grampians      | 142.3  | -37.3  | Very high |

|       |                                   |      |            |     |                |        |        |           |
|-------|-----------------------------------|------|------------|-----|----------------|--------|--------|-----------|
| 2014a | 2014 (16 Jan) Vic: Grampians      | 2014 | 16/01/2014 | Vic | Grampians      | 142.4  | -37    | Very high |
| 2014b | 2014 (17 Jan) Vic: Grampians      | 2014 | 17/01/2014 | Vic | Grampians      | 142.3  | -37.1  | Very high |
| 2014c | 2014 (09 Feb) Vic: East Gippsland | 2014 | 09/02/2014 | Vic | East Gippsland | 148.5  | -37.3  | Very high |
| 2015a | 2015 (07 Jan) Vic: Black Range    | 2015 | 07/01/2015 | Vic | Black Range    | 142.1  | -37.1  | Very high |
| 2015b | 2015 (07 Jan) Vic: Nhill          | 2015 | 07/01/2015 | Vic | Nhill          | 141.4  | -36.5  | Moderate  |
| 2016a | 2016 (06 Jan) WA: Waroona         | 2016 | 06/01/2016 | WA  | Waroona        | 116    | -32.9  | Very high |
| 2016b | 2016 (07 Jan) WA: Waroona         | 2016 | 07/01/2016 | WA  | Waroona        | 116    | -32.9  | Very high |
| 2016c | 2016 (07 Jan) WA: Waroona         | 2016 | 07/01/2016 | WA  | Waroona        | 116    | -32.9  | Very high |
| 2016d | 2016 (05 Dec) Qld: Cecil Plains   | 2016 | 05/12/2016 | Qld | Cecil Plains   | 151    | -28.2  | Very high |
| 2016e | 2016 (06 Dec) Qld: Cecil Plains   | 2016 | 06/12/2016 | Qld | Cecil Plains   | 151    | -28.2  | Very high |
| 2016f | 2016 (07 Dec) WA: Cocklebiddy     | 2016 | 07/12/2016 | WA  | Cocklebiddy    | 126    | -32.1  | Very high |
| 2017a | 2017 (12 Feb) NSW: Sir Ivan Fire  | 2017 | 12/02/2017 | NSW | Sir Ivan Fire  | 149.55 | -32.05 | Very high |
| 2017b | 2017 (08 Nov) WA: Table Hill      | 2017 | 08/11/2017 | WA  | Table Hill     | 117.02 | -34.65 | Very high |
| 2017c | 2017 (08 Nov) WA: Table Hill      | 2017 | 08/11/2017 | WA  | Table Hill     | 117.16 | -34.69 | Very high |
| 2018a | 2018 (04 Nov) WA: Deserts         | 2018 | 04/11/2017 | WA  | Deserts        | 122.3  | -21    | High      |
| 2019a | 2019 (25 Jan) Vic: Timbarra       | 2019 | 25/01/2019 | Vic | Timbarra       | 148.1  | -37.1  | Very high |
| 2019b | 2019 (03 Feb) Vic: Timbarra       | 2019 | 03/02/2019 | Vic | Timbarra       | 148.16 | -36.97 | Very high |
| 2019c | 2019 (03 Feb) Vic: Walhalla       | 2019 | 03/02/2019 | Vic | Walhalla       | 146.53 | -37.96 | Very high |
| 2019d | 2019 (27 Feb) WA: Goldfields      | 2019 | 27/02/2019 | WA  | Goldfields     | 120.7  | -32.5  | Very high |
| 2019e | 2019 (27 Feb) WA: Goldfields      | 2019 | 27/02/2019 | WA  | Goldfields     | 122.7  | -33    | Very high |
| 2019f | 2019 (27 Feb) WA: Goldfields      | 2019 | 27/02/2019 | WA  | Goldfields     | 122.7  | -33    | Very high |
| 2019g | 2019 (01 Mar) WA: Goldfields      | 2019 | 01/03/2019 | WA  | Goldfields     | 124.5  | -24.5  | Very high |
| 2019h | 2019 (01 Mar) WA: Goldfields      | 2019 | 01/03/2019 | WA  | Goldfields     | 124.3  | -28.5  | Very high |
| 2019i | 2019 (02 Mar) Vic: Licola         | 2019 | 02/03/2019 | Vic | Licola         | 146.7  | -37.6  | Very high |
| 2019j | 2019 (02 Mar) Vic: Bunyip         | 2019 | 02/03/2019 | Vic | Bunyip         | 145.7  | -38    | Very high |

|        |                                   |      |            |     |                |        |        |           |
|--------|-----------------------------------|------|------------|-----|----------------|--------|--------|-----------|
| 2019k  | 2019 (03 Mar) Vic: Licola         | 2019 | 03/03/2019 | Vic | Licola         | 146.7  | -37.65 | Very high |
| 2019l  | 2019 (03 Mar) Vic: Bunyip         | 2019 | 03/03/2019 | Vic | Bunyip         | 146.9  | -38.2  | Very high |
| 2019m  | 2019 (04 Mar) Vic: Licola         | 2019 | 04/03/2019 | Vic | Licola         | 146.75 | -37.7  | Very high |
| 2019n  | 2019 (04 Mar) Vic: High Plains    | 2019 | 04/03/2019 | Vic | High Plains    | 147.2  | -37.1  | Very high |
| 2019o  | 2019 (04 Mar) Vic: Dargo          | 2019 | 04/03/2019 | Vic | Dargo          | 147.1  | -37.4  | Very high |
| 2019p  | 2019 (04 Mar) Vic: Mt Wellington  | 2019 | 04/03/2019 | Vic | Mt Wellington  | 146.8  | -37.5  | Very high |
| 2019q  | 2019 (05 Mar) Vic: Tea TreeRange  | 2019 | 05/03/2019 | Vic | Tea TreeRange  | 147    | -37.3  | Very high |
| 2019r  | 2019 (05 Mar) Vic: Dargo          | 2019 | 05/03/2019 | Vic | Dargo          | 147.27 | -37.2  | Very high |
| 2019s  | 2019 (05 Mar) Vic: Licola         | 2019 | 05/03/2019 | Vic | Licola         | 146.8  | -37.7  | Very high |
| 2019t  | 2019 (05 Mar) Vic: Dargo          | 2019 | 05/03/2019 | Vic | Dargo          | 147.3  | -37.2  | Very high |
| 2019u  | 2019 (22 Nov) NSW: Grose Valley   | 2019 | 22/11/2019 | NSW | Grose Valley   | 150.44 | -33.6  | Very high |
| 2019v  | 2019 (10 Dec) Vic: Mt Skene       | 2019 | 10/12/2019 | Vic | Mt Skene       | 146.4  | -37.5  | Moderate  |
| 2019w  | 2019 (10 Dec) NSW: Mt Werong      | 2019 | 10/12/2019 | NSW | Mt Werong      | 149.98 | -34.08 | Very high |
| 2019x  | 2019 (14 Dec) Vic: Grant Junction | 2019 | 14/12/2019 | Vic | Grant Junction | 147.2  | -37.4  | Moderate  |
| 2019y  | 2019 (18 Dec) WA: Esperance       | 2019 | 18/12/2019 | WA  | Esperance      | 120    | -32.6  | Very high |
| 2019z  | 2019 (19 Dec) NSW: West of Sydney | 2019 | 19/12/2019 | NSW | West of Sydney | 149.79 | -34.12 | Very high |
| 2019aa | 2019 (20 Dec) Vic: Tambo Crossing | 2019 | 20/12/2019 | Vic | Tambo Crossing | 147.85 | -37.65 | Very high |
| 2019ab | 2019 (21 Dec) NSW: Ilford         | 2019 | 21/12/2019 | NSW | Ilford         | 149.8  | -33    | Very high |
| 2019ac | 2019 (21 Dec) NSW: Ulladulla      | 2019 | 21/12/2019 | NSW | Ulladulla      | 150.28 | -35.19 | Very high |
| 2019ac | 2019 (21 Dec) NSW: Mt Irvine      | 2019 | 21/12/2019 | NSW | Mt Irvine      | 150.4  | -33.6  | Very high |
| 2019ad | 2019 (28 Dec) NSW: Tumut area     | 2019 | 28/12/2019 | NSW | Tumut area     | 148.16 | -35.42 | Very high |
| 2019ae | 2019 (28 Dec) NSW: Badja area     | 2019 | 28/12/2019 | NSW | Badja area     | 149.5  | -36.17 | Very high |
| 2019af | 2019 (28 Dec) NSW: Ulladulla area | 2019 | 28/12/2019 | NSW | Ulladulla area | 149.97 | -35.58 | Very high |
| 2019ag | 2019 (28 Dec) NSW: Nowra area     | 2019 | 28/12/2019 | NSW | Nowra area     | 150.43 | -34.9  | Very high |
| 2019ag | 2019 (28 Dec) NSW: Mt Tianjara    | 2019 | 28/12/2019 | NSW | Mt Tianjara    | 150.2  | -35    | Very high |

|        |                                        |      |            |     |                     |        |        |           |
|--------|----------------------------------------|------|------------|-----|---------------------|--------|--------|-----------|
| 2019ah | 2019 (29 Dec) NSW: Wombeyan Caves area | 2019 | 29/12/2019 | NSW | Wombeyan Caves area | 150    | -34.3  | Very high |
| 2019ah | 2019 (29 Dec) Vic: Goonjerah           | 2019 | 29/12/2019 | Vic | Goonjerah           | 148.7  | -37.3  | Very high |
| 2019ai | 2019 (29 Dec) Vic: Cann River          | 2019 | 29/12/2019 | Vic | Cann River          | 149.4  | -37.6  | Very high |
| 2019aj | 2019 (30 Dec) Vic: Wulgulmerang        | 2019 | 30/12/2019 | Vic | Wulgulmerang        | 148.9  | -37.3  | Very high |
| 2019ak | 2019 (30 Dec) NSW: E of Cooma          | 2019 | 30/12/2019 | NSW | E of Cooma          | 149.8  | -36.1  | Very high |
| 2019al | 2019 (30 Dec) Vic: Cann River          | 2019 | 30/12/2019 | Vic | Cann River          | 149.4  | -37.6  | Very high |
| 2019am | 2019 (30 Dec) Vic: Cann River          | 2019 | 30/12/2019 | Vic | Cann River          | 149.4  | -37.6  | Very high |
| 2019an | 2019 (30 Dec) Vic: Ensay               | 2019 | 30/12/2019 | Vic | Ensay               | 147.8  | -37.4  | Very high |
| 2019ao | 2019 (30 Dec) Vic: Diggers Hole        | 2019 | 30/12/2019 | Vic | Diggers Hole        | 148.13 | -37.09 | Very high |
| 2019ap | 2019 (30 Dec) Vic: Bullumwaal          | 2019 | 30/12/2019 | Vic | Bullumwaal          | 147.63 | -37.62 | Very high |
| 2019aq | 2019 (31 Dec) NSW: Yarrangobilly       | 2019 | 31/12/2019 | NSW | Yarrangobilly       | 148.1  | -35.7  | Very high |
| 2019ar | 2019 (31 Dec) NSW: Nowra               | 2019 | 31/12/2019 | NSW | Nowra               | 150.5  | -35    | Very high |
| 2019as | 2019 (30 Dec) Vic: Goonjerah           | 2019 | 30/12/2019 | Vic | Goonjerah           | 148.44 | -37.71 | Very high |
| 2019at | 2019 (10 Dec) NSW: Gibraltar Range     | 2019 | 10/12/2019 | NSW | Gibraltar Range     | 152.2  | -29.5  | Very high |
| 2019au | 2019 (10 Dec) NSW: Nullo Mtn           | 2019 | 10/12/2019 | NSW | Nullo Mtn           | 150.3  | -32.8  | Very high |
| 2019av | 2019 (10 Dec) NSW: Cockatoo Hill       | 2019 | 10/12/2019 | NSW | Cockatoo Hill       | 150.3  | -33.4  | Moderate  |
| 2019aw | 2019 (10 Dec) NSW: Mt Carrington       | 2019 | 10/12/2019 | NSW | Mt Carrington       | 151.8  | -31.4  | Very high |
| 2019ax | 2019 (10 Dec) NSW: Paddys flat         | 2019 | 10/12/2019 | NSW | Paddys flat         | 152.4  | -28.7  | Very high |
| 2020a  | 2020 (01 Jan) NSW: Nullo Mtn           | 2020 | 01/01/2020 | NSW | Nullo Mtn           | 150.25 | -32.72 | Very high |
| 2020b  | 2020 (04 Jan) NSW: Nowra               | 2020 | 04/01/2020 | NSW | Nowra               | 150.4  | -34.8  | Very high |
| 2020c  | 2020 (04 Jan) NSW: Cabramurra          | 2020 | 04/01/2020 | NSW | Cabramurra          | 148.3  | -35.5  | Very high |
| 2020d  | 2020 (04 Jan) NSW: W of Mt Kosciuszko  | 2020 | 04/01/2020 | NSW | W of Mt Kosciuszko  | 148.1  | -36.5  | Very high |
| 2020e  | 2020 (04 Jan) NSW: Cabramurra          | 2020 | 04/01/2020 | NSW | Cabramurra          | 148.3  | -35.5  | Very high |
| 2020f  | 2020 (08 Jan) WA: Belladonia           | 2020 | 08/01/2020 | WA  | Belladonia          | 123.2  | -32.7  | Very high |

|       |                                  |      |            |    |                |        |        |           |
|-------|----------------------------------|------|------------|----|----------------|--------|--------|-----------|
| 2020g | 2020 (08 Jan) WA: Belladonia     | 2020 | 08/01/2020 | WA | Belladonia     | 123.9  | -33.1  | Very high |
| 2020h | 2020 (08 Jan) WA: Bald Rock Fire | 2020 | 08/01/2020 | WA | Bald Rock Fire | 119.6  | -32.5  | Moderate  |
| 2020i | 2020 (08 Jan) WA: Lake King Fire | 2020 | 08/01/2020 | WA | Lake King Fire | 120    | -33    | Moderate  |
| 2020j | 2020 (08 Jan) WA: Wingarnie      | 2020 | 08/01/2020 | WA | Wingarnie      | 121.6  | -31.9  | Moderate  |
| 2021a | 2021 (23 Jan) WA: Balladonia     | 2021 | 23/01/2021 | WA | Balladonia     | 123.52 | -32.05 | Very high |

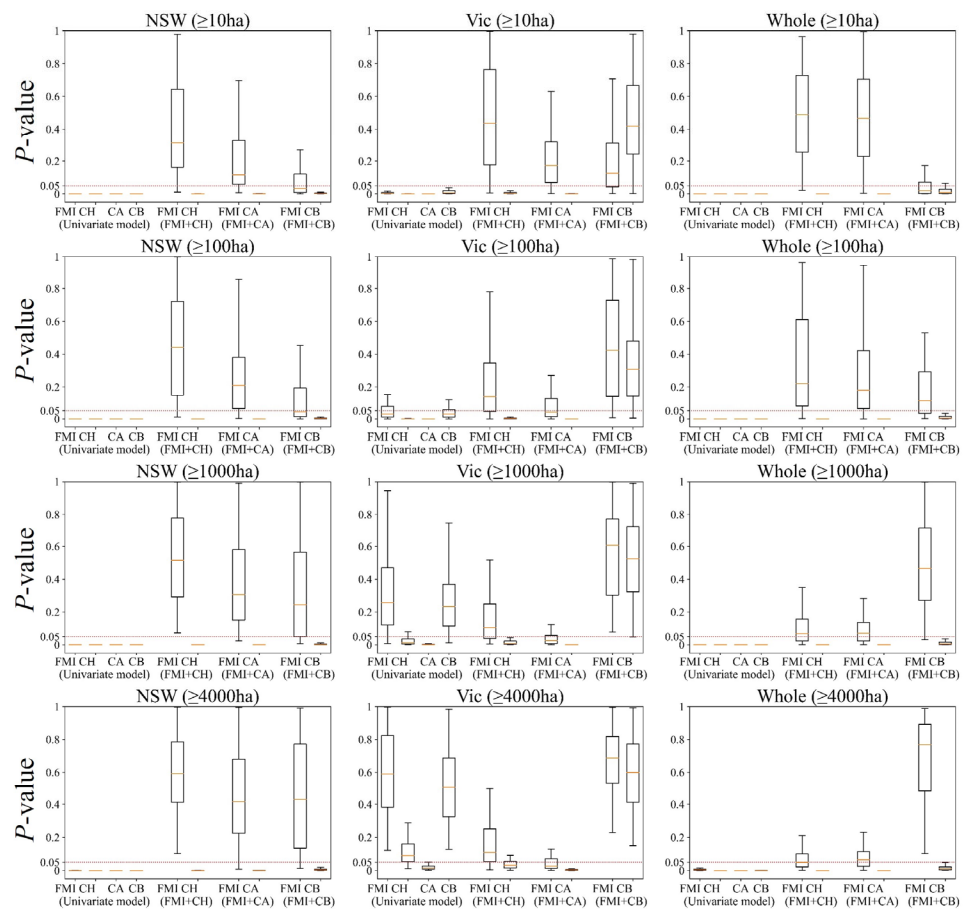

**Figure S1** P value distribution of *FMI*, *C-Haines* (*CH*), *CA*, *CB* in univariate models and multi-variate models at 0200UTC, the y-axis indicates the P value, the x-axis indicates variables, and the second line of the x-axis label in parentheses indicates the model type.

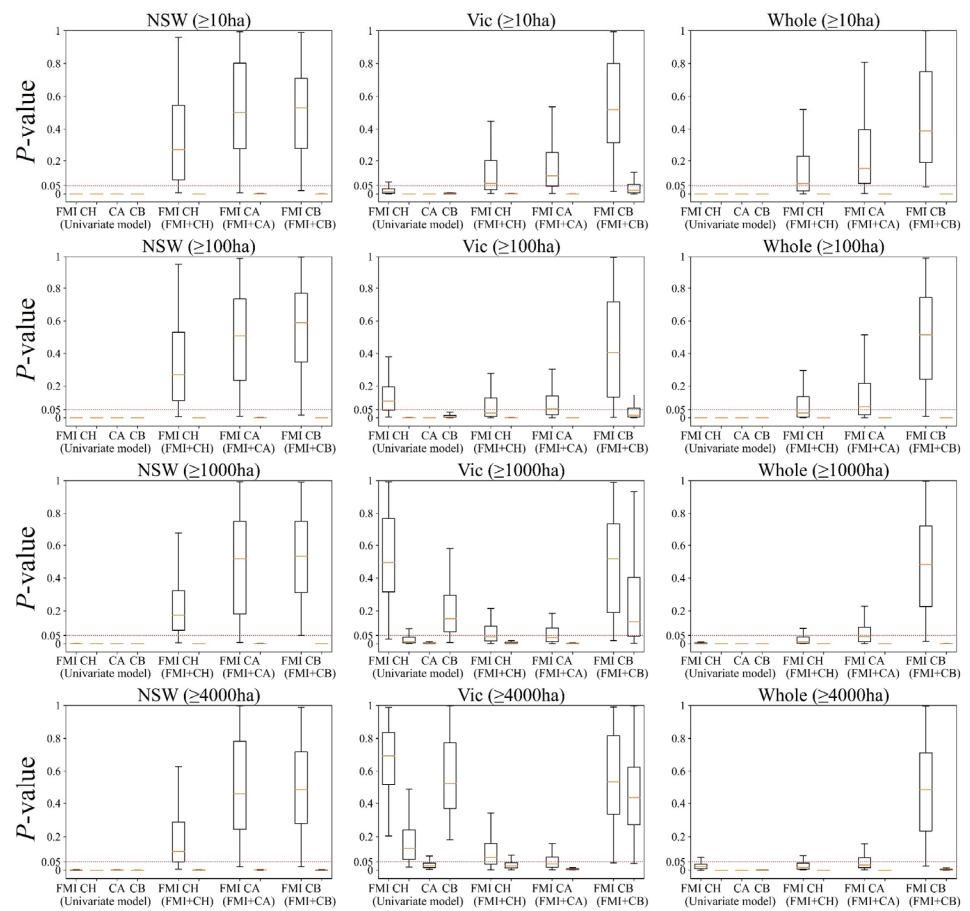

**Figure S2**  $P$ -value distribution of *FMI*, *C-Haines (CH)*, *CA*, *CB* in univariate models and multivariate models at 0400UTC, the y-axis indicates the  $p$ -value, the x-axis indicates variables, and the second line of the x-axis label in parentheses indicates the model type.

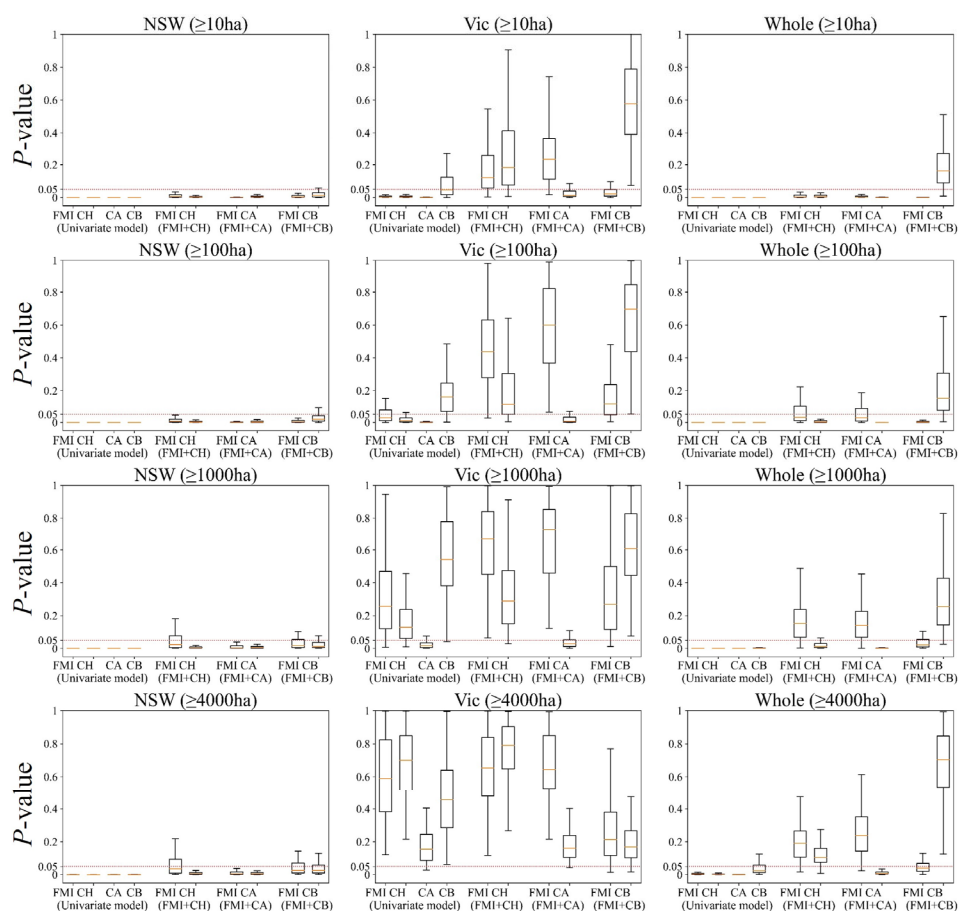

Figure S3 *P*-value distribution of *FMI*, *C-Haines* (*CH*), *CA*, *CB* in univariate models and multivariate models at 0800UTC, the *y*-axis indicates the *p*-value, the *x*-axis indicates variables, and the second line of the *x*-axis label in parentheses indicates the model type.

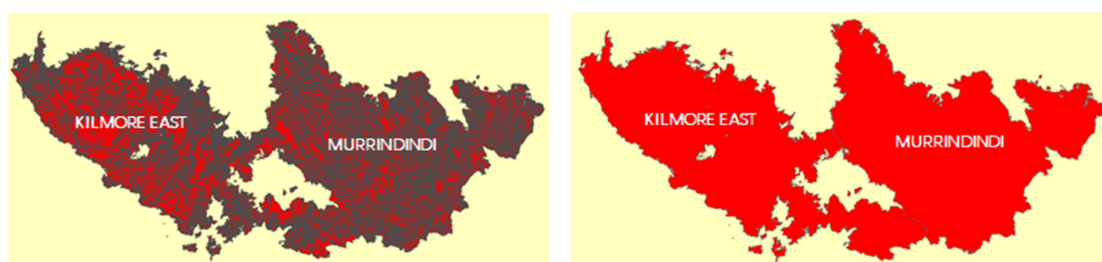

Figure S4 Two fires that occurred in 2009 recorded in Vic fire history dataset. On the left is the original data, with 98,103 polygons for these two fires. On the right is the merged fire polygons. The white letters are the names of the two fires.
